# Supplementary material for: Theoretical study of the proton transfer wires influence on the one- and two-photon absorption properties of green fluorescent protein chromophore
Source: Royal Society of Chemistry journal article supplement (doi:10.1039/c2ob26914g), 2013-01-01
Supplement: c2ob26914g.pdf [file c2ob26914g.pdf]

Theoretical Study of the proton transfer wires influence  
on the one- and two-photon absorption properties of  
Green Fluorescent Protein chromophore

(Supplementary Information)

*Minyi Zhang, Can Xu, Chensheng Lin, Xiangfeng Guan, Wendan Cheng\**

STABLE 1: Selected Optimized Structural Parameters (Bond Length (Å), angle(°)) of Cro A, Complex A and Complex I at the ground and excited state, respectively. Superscript \* notes as the first excited-state of that conformer.

| Parameters    | Cro A   | Complex A | Complex A* | Complex I | Complex I* |
|---------------|---------|-----------|------------|-----------|------------|
| C1-O14        | 1.3573  | 1.3500    | 1.3431     | 1.2895    | 1.2853     |
| C1-C2         | 1.4024  | 1.4055    | 1.4109     | 1.4354    | 1.4371     |
| C2-C3         | 1.3864  | 1.3844    | 1.3786     | 1.3750    | 1.3761     |
| C3-C4         | 1.4119  | 1.4123    | 1.4364     | 1.4220    | 1.4364     |
| C4-C5         | 1.4126  | 1.4129    | 1.4370     | 1.4217    | 1.4363     |
| C5-C6         | 1.3853  | 1.3856    | 1.3742     | 1.3784    | 1.3726     |
| C1-C6         | 1.4003  | 1.4032    | 1.4148     | 1.4334    | 1.4429     |
| C4-C7         | 1.4469  | 1.4463    | 1.4071     | 1.4289    | 1.4191     |
| C7-C8         | 1.3588  | 1.3597    | 1.4275     | 1.3718    | 1.4192     |
| ∠C4-C7-C8-N12 | -0.2346 | -3.1359   | -21.2130   | -1.8576   | -6.3401    |

Stable 2 Dipole Moments (Debye) at Ground and First Excitation States for Studied Conformers at B3LYP/6-311++G\*\* Level

| conformer  | Ground state dipole moment |          |         | First excited state dipole moment |         |         | S0-S1 transition moments |         |         |
|------------|----------------------------|----------|---------|-----------------------------------|---------|---------|--------------------------|---------|---------|
|            | X                          | Y        | Z       | X                                 | Y       | Z       | X                        | Y       | Z       |
| Cro A      | -0.1991                    | 7.6458   | 1.0539  | 2.0662                            | 1.1851  | -0.0825 | -7.9621                  | -1.4364 | 0.3424  |
| Complex A  | 2.4613                     | -0.7405  | 8.0034  | -3.0883                           | 0.8274  | -0.1661 | -6.9451                  | 4.0038  | -0.5991 |
| Complex I  | -2.7947                    | -12.7435 | 3.4852  | -4.7078                           | 2.3418  | -0.2874 | -8.2455                  | 4.4298  | -0.5793 |
| Complex Da | 22.3256                    | 6.2764   | -0.2246 | -5.0323                           | -0.8808 | 0.4805  | -8.5375                  | -2.0525 | 0.6349  |
| Complex Di | 15.1529                    | 9.9551   | -2.2843 | -3.8889                           | -0.6303 | 0.1723  | -9.7151                  | -1.6804 | 0.3772  |

Table 3 Dipole and Transition Moments (Debye) of Relevant Excitations for each Studied Conformer at B3LYP/6-311++G\*\* Level. n Denotes the final transition excited-state.

| conformer  | Transition states | S0-Sn transition moments |         |         | S1-Sn transition moments |         |         |
|------------|-------------------|--------------------------|---------|---------|--------------------------|---------|---------|
|            |                   | X                        | Y       | Z       | X                        | Y       | Z       |
| Cro A      | S3                | 2.1506                   | 0.2926  | -0.0729 | -9.3890                  | -1.4714 | 0.3284  |
| Complex A  | S4                | -1.4831                  | 0.8510  | -0.2227 | -7.6350                  | 4.9392  | -0.5943 |
| Complex I  | S4                | -0.3869                  | 0.1279  | -0.1459 | -5.6692                  | 3.3234  | -0.4176 |
| Complex Da | S4                | 0.9844                   | 0.2061  | -0.0386 | 8.5635                   | 2.3804  | -0.6659 |
| Complex Di | S3                | -1.1151                  | -0.2483 | -0.0465 | -8.0582                  | -1.6877 | 0.3149  |

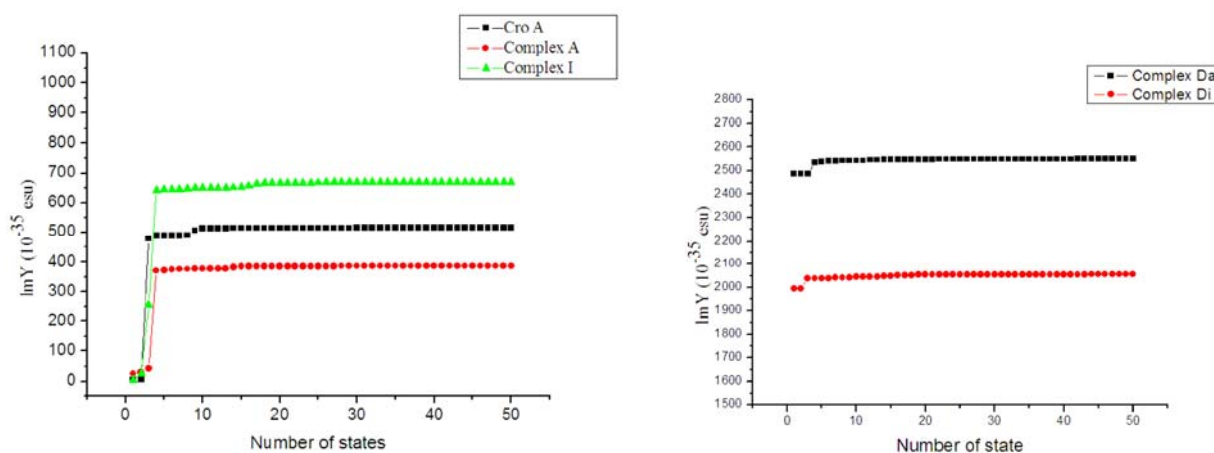

Figure 1. The relationship of the imaginary part of the third-order optical susceptibility and the number of state.

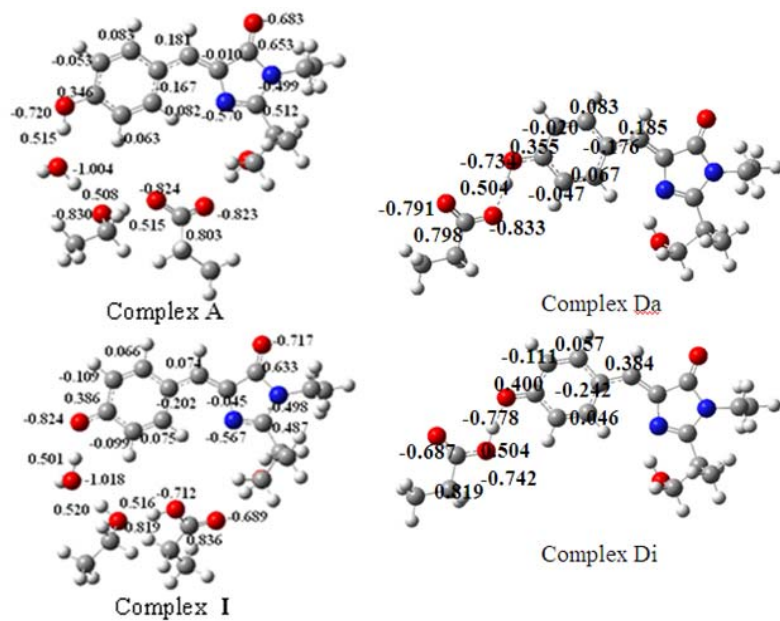

Figure 2. NBO charges of studied conformers (hydrogens summed on the corresponding heavy atoms).
